# Supplementary material
Source: Springer Nature journal article supplement (https://www.springermedizin.de/resource/supplementary/12968_2011_2579_MOESM8_ESM.pdf/9582312)

## 1D Circumferential Strain

## 1D Longitudinal Strain

Mid

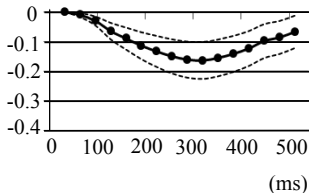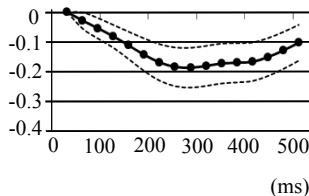

Inflow

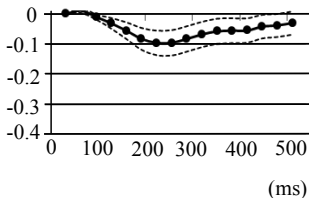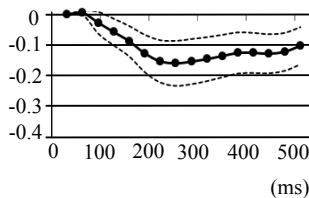

Outflow

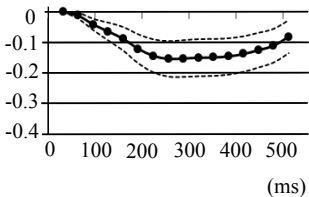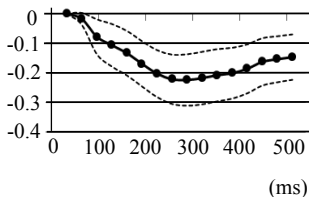

Apex

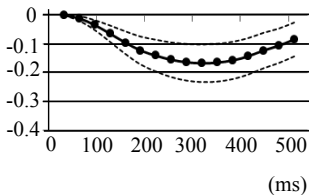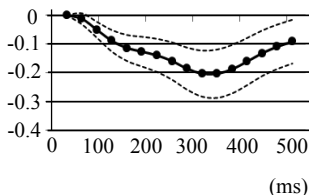

Supplement: MOESM8 [file 9582312]
